# Supplementary material for: Minor Sea Turtle Nesting Areas May Remain Unnoticed without Specific Monitoring: The Case of the Largest Mediterranean Island (Sicily, Italy)
Source: MDPI journal article supplement (doi:10.3390/ani12091221), 2022-05-09
Supplement: s1 [file s1]

## SUPPLEMENTAL MATERIAL

### **Minor sea turtle nesting areas may remain unnoticed without specific monitoring: the case of the largest Mediterranean island (Sicily, Italy)**

Oleana Olga Prato<sup>1</sup>, Valentina Paduano<sup>1</sup>, Giulia Baldi<sup>2</sup>, Salvatore Bonsignore<sup>1</sup>, Gerlando Callea<sup>1</sup>, Carlo Camera<sup>1</sup>, Girolamo Culmone<sup>3</sup>, Stefania D'angelo<sup>1</sup>, Diego Fiorentino<sup>1</sup>, Gino Galia<sup>1</sup>, Salvatore Coriglione<sup>1</sup>, Laura Genco<sup>1</sup>, Giuseppe Mazzotta<sup>1</sup>, Nicola Napolitano<sup>1</sup>, Francesco Paolo Palazzo<sup>1</sup>, Giuseppe Palilla<sup>1</sup>, Dylan Pelletti<sup>1</sup>, Toni Mingoizzi<sup>4</sup>, Luigi Agresti<sup>1</sup>, Paolo Casale<sup>2\*</sup>

<sup>1</sup> WWF Italy, Via Po, 25c, 00198, Roma, Italy

<sup>2</sup> Department of Biology, University of Pisa, via A. Volta 6, 56126, Pisa

<sup>3</sup> Associazione Caretta caretta, via L. Ariosto 86, 92031 Lampedusa, Italy

<sup>4</sup> DiBEST, Dept. of Biology, Ecology and Earth Sciences, Università della Calabria, P.te P. Bucci, Cubo 4/B, 87030 Rende CS, Italy

\*Corresponding author: [paolo.casale@unipi.it](mailto:paolo.casale@unipi.it)

**Table S1.** Emergences (Nests: N; False Crawls: FC) of loggerhead sea turtle in Sicily, from 1944 to 2021. For each event a reference is reported, for multiple references the number of events is in parentheses.

| UF | Year      | Locality #vp                               | N | FC | ITA              | Type       | Reference                     |
|----|-----------|--------------------------------------------|---|----|------------------|------------|-------------------------------|
| G  | 1944      | Scicli, Sampieri, RG                       | 1 |    | 080008           | ZSC        | Fabrizi Daniele 1944 [7]      |
| D  | 1960      | Giarre, S. Anna, CT                        | 1 |    |                  |            | Lino Luigi 1960 [14]          |
| H  | 1963-1969 | Scoglitti, Foce Ippari, RG                 | 1 |    |                  |            | Mingozzi et al. 2007 [16]     |
| I  | 1963-1969 | Castarozzo di Palma, Marina di Palma, AG   | 2 |    | 040010           | ZSC        | Mingozzi et al. 2007 (3) [16] |
| I  | 1963-1969 | Palma di Montechiaro, Marina di Palma, AG  | 1 |    |                  |            | Mingozzi et al. 2007 (3) [16] |
| F  | 1978-1983 | Portopalo di Capopassero,SR                | 1 |    | 090003           | ZSC        | Mingozzi et al. 2007 [16]     |
| H  | 1978-1983 | Gela, CL                                   | 1 |    |                  |            | Mingozzi et al. 2007 [16]     |
| N  | 1978-1983 | Marsala, Petrosino, TP                     | 1 |    |                  |            | Mingozzi et al. 2007 [16]     |
| E  | 1985      | Augusta, Agnone Bagni, SR                  | 1 |    |                  |            | Mingozzi et al. 2007 [16]     |
| F  | 1986      | Noto, Vendicari, SR                        | 1 |    | 090002<br>090027 | ZSC<br>SIC | Mingozzi et al. 2007 [16]     |
| H  | 1986      | Gela, CL                                   | 1 |    | 050012           | ZPS        | Mingozzi et al. 2007 [16]     |
| N  | 1986      | Marsala, TP                                | 1 |    |                  |            | Mingozzi et al. 2007 [16]     |
| E  | 1987      | Catania, Vaccarizzo, Villaggio nettuno, CT | 1 |    | 070001<br>070029 | ZSC<br>ZPS | Torresi Andrea 1987 [18]      |
| K  | 1990      | Sciacca, Porto, TP                         | 1 |    |                  |            | Mingozzi et al. 2007 [16]     |
| M  | 1990      | Mazara del vallo, Porto nuovo, TP          | 1 |    |                  |            | Mingozzi et al. 2007 [16]     |
| I  | 1992      | Palma di Montechiaro, Malerba, AG          | 1 |    | 040010           | ZSC        | Mingozzi et al. 2007 [16]     |
| K  | 1993      | Sciacca, Porto, TP                         | 1 |    |                  |            | Mingozzi et al. 2007 [16]     |
| L  | 1993      | Menfi, Lido Fiori, AG                      | 1 |    | 040012           | SIC        | Mingozzi et al. 2007 [16]     |
| I  | 1994      | Palma di Montechiaro, Marina di Palma, AG  | 1 |    |                  |            | Galia Franco 1994 [9]         |
| K  | 1995      | Siculiana,Torre salsa, AG                  | 2 |    | 040003           | ZSC        | Mingozzi et al. 2007 (2) [16] |

|   |      |                                   |   |   |                  |            |                                                                                                                                                                                                                                                                                                                                                                                                                                                                                                        |
|---|------|-----------------------------------|---|---|------------------|------------|--------------------------------------------------------------------------------------------------------------------------------------------------------------------------------------------------------------------------------------------------------------------------------------------------------------------------------------------------------------------------------------------------------------------------------------------------------------------------------------------------------|
| F | 1996 | Noto, Vendicari, SR               | 1 |   | 090002<br>090027 | ZSC<br>SIC | <a href="http://www.arcipescafisa.it/UserFiles/File/Newsletter_n30_Agosto10.pdf">Http://www.arcipescafisa.it/UserFiles/File/Newsletter_n30_Agosto10.pdf</a>                                                                                                                                                                                                                                                                                                                                            |
| H | 1996 | Scoglitti, Porto, RG              | 1 |   |                  |            | Mingozzi et al. 2007 [16]                                                                                                                                                                                                                                                                                                                                                                                                                                                                              |
| J | 1996 | Realmonte, Punta Grande, AG       | 1 |   |                  |            | Mingozzi et al. 2007 [16]                                                                                                                                                                                                                                                                                                                                                                                                                                                                              |
| M | 1996 | Mazara del vallo, Biscione, TP    | 1 |   |                  |            | Mingozzi et al. 2007 [16]                                                                                                                                                                                                                                                                                                                                                                                                                                                                              |
| J | 1999 | Realmonte, Punta Grande, AG       | 1 |   |                  |            | Mingozzi et al. 2007 [16]                                                                                                                                                                                                                                                                                                                                                                                                                                                                              |
| K | 1999 | Siculiana,Torre salsa, AG         | 1 |   | 040003           | ZSC        | Mingozzi et al. 2007 [16]                                                                                                                                                                                                                                                                                                                                                                                                                                                                              |
| H | 2000 | Gela, CL                          | 1 |   |                  |            | Mingozzi et al. 2007 [16]                                                                                                                                                                                                                                                                                                                                                                                                                                                                              |
| G | 2002 | Punta delle Formiche              | 1 |   | 090003           | ZSC        | Local citizen 2002 [15]                                                                                                                                                                                                                                                                                                                                                                                                                                                                                |
| J | 2002 | Porto empedocle, Villa Romana, AG | 1 |   |                  |            | Mingozzi et al. 2007 [16]                                                                                                                                                                                                                                                                                                                                                                                                                                                                              |
| K | 2003 | Sciacca, Porto, TP                | 1 |   |                  |            | Mingozzi et al. 2007 [16]                                                                                                                                                                                                                                                                                                                                                                                                                                                                              |
| K | 2005 | Realmonte, Giallonardo, AG        | 2 |   |                  |            | Galia et al. 2006 (2) [10]                                                                                                                                                                                                                                                                                                                                                                                                                                                                             |
| L | 2006 | Menfi, Mandrarossa, AG            | 1 |   |                  |            | <a href="http://www.wwftorresalsa.it/02_08_06-html">http://www.wwftorresalsa.it/02_08_06-html</a>                                                                                                                                                                                                                                                                                                                                                                                                      |
| E | 2007 | Augusta, Agnone, SR               | 1 |   |                  |            | Torrisi Andrea 2007 [18]                                                                                                                                                                                                                                                                                                                                                                                                                                                                               |
| N | 2007 | Custonaci, Cornino, TP            | 1 |   | 010025           | SIC        | Genco et al. 2008 [11]                                                                                                                                                                                                                                                                                                                                                                                                                                                                                 |
| K | 2008 | Realmonte, Giallonardo, AG        | 1 |   |                  |            | <a href="http://www.adnkronos.com/IGN/Cronaca/?id=3.0.2589567347">http://www.adnkronos.com/IGN/Cronaca/?id=3.0.2589567347</a>                                                                                                                                                                                                                                                                                                                                                                          |
| K | 2008 | Siculiana, Siculiana marina, AG   | 1 |   |                  |            | Present study                                                                                                                                                                                                                                                                                                                                                                                                                                                                                          |
| F | 2010 | Avola, Piccio, SR                 | 1 |   |                  |            | Insacco et al. 2011 [12]                                                                                                                                                                                                                                                                                                                                                                                                                                                                               |
| F | 2010 | Noto, Lido di noto, SR            | 2 |   |                  |            | Insacco et al. 2011 (2) [12]                                                                                                                                                                                                                                                                                                                                                                                                                                                                           |
| F | 2010 | Noto, Vendicari, SR               | 1 | 1 | 090002<br>090027 | ZSC<br>SIC | <a href="https://www.scomunicando.it/notizie/tartaruga-caretta-caretta-depone-uova-a-vendicari-e-linosa-2/">https://www.scomunicando.it/notizie/tartaruga-caretta-caretta-depone-uova-a-vendicari-e-linosa-2/;</a><br><a href="Http://www.arcipescafisa.it/UserFiles/File/Newsletter_n30_Agosto10.pdf">Http://www.arcipescafisa.it/UserFiles/File/Newsletter_n30_Agosto10.pdf</a><br><a href="https://sikulamente.wordpress.com/tag/tartarughe/">https://sikulamente.wordpress.com/tag/tartarughe/</a> |
| F | 2010 | Noto, S. Lorenzo, SR              | 1 |   |                  |            | <a href="https://sikulamente.wordpress.com/tag/tartarughe/">https://sikulamente.wordpress.com/tag/tartarughe/</a>                                                                                                                                                                                                                                                                                                                                                                                      |
| S | 2010 | Pollina, Finale di Pollina, PA    | 1 |   |                  |            | Insacco et al. 2011 [12]                                                                                                                                                                                                                                                                                                                                                                                                                                                                               |
| G | 2011 | Ragusa, Torre Cabrera, RG         | 1 |   |                  |            | <a href="http://www.ragusaoggi.it/11498/">http://www.ragusaoggi.it/11498/</a>                                                                                                                                                                                                                                                                                                                                                                                                                          |
| J | 2011 | Realmonte, Punta Grande, AG       | 1 |   |                  |            | Casale et al. 2012 [3]                                                                                                                                                                                                                                                                                                                                                                                                                                                                                 |
| K | 2011 | Realmonte, Giallonardo, AG        | 4 |   |                  |            | Casale et al. 2012 (4) [3]                                                                                                                                                                                                                                                                                                                                                                                                                                                                             |
| L | 2011 | Sciacca, Capo San Marco, AG       | 1 |   | 040012           | SIC        | <a href="http://sciacca.agrigentonotizie.it/cronaca/sciacca-si-schiudono-uova-di-caretta-car_62">http://sciacca.agrigentonotizie.it/cronaca/sciacca-si-schiudono-uova-di-caretta-car_62</a>                                                                                                                                                                                                                                                                                                            |
| L | 2011 | Menfi, Porto Palo, AG             | 1 |   |                  |            | Casale et al. 2012 [3]                                                                                                                                                                                                                                                                                                                                                                                                                                                                                 |
| Q | 2011 | Palermo, Acqua dei corsari, PA    | 1 |   |                  |            | Casale et al. 2012 [3]                                                                                                                                                                                                                                                                                                                                                                                                                                                                                 |
| E | 2012 | Catania, Plaja di Catania, CT     | 1 |   |                  |            | <a href="Http://www.pro-natura.it/files/redazione/natura-e-societa/2012-03.pdf">Http://www.pro-natura.it/files/redazione/natura-e-societa/2012-03.pdf</a>                                                                                                                                                                                                                                                                                                                                              |

|   |      |                                               |   |  |                  |            |                                                                                                                                                                                                                                                                                                                                                                                                                                                                                                    |
|---|------|-----------------------------------------------|---|--|------------------|------------|----------------------------------------------------------------------------------------------------------------------------------------------------------------------------------------------------------------------------------------------------------------------------------------------------------------------------------------------------------------------------------------------------------------------------------------------------------------------------------------------------|
| E | 2012 | Augusta, Agnone Bagni, SR                     | 1 |  |                  |            | <a href="http://www.pro-natura.it/files/redazione/natura-e-societa/2012-03.pdf">Http://www.pro-natura.it/files/redazione/natura-e-societa/2012-03.pdf</a>                                                                                                                                                                                                                                                                                                                                          |
| K | 2012 | Realmonte, Giallonardo, AG                    | 1 |  |                  |            | <a href="http://www.wwf.it/client/stampa.aspx">http://www.wwf.it/client/stampa.aspx</a>                                                                                                                                                                                                                                                                                                                                                                                                            |
| K | 2012 | Eraclea minoa, CapoBianco, AG                 | 1 |  | 040003           | ZSC        | <a href="http://www.comunicalo.it/index.php?option=com_content&amp;view=article&amp;id=11832">http://www.comunicalo.it/index.php?option=com_content&amp;view=article&amp;id=11832</a>                                                                                                                                                                                                                                                                                                              |
| M | 2012 | Mazara del vallo, Tonnarella, TP              | 1 |  |                  |            | <a href="http://www.mazaraonline.it/?p=41236&amp;print=1">http://www.mazaraonline.it/?p=41236&amp;print=1</a>                                                                                                                                                                                                                                                                                                                                                                                      |
| A | 2013 | Messina, Venetico, ME                         | 1 |  |                  |            | Isgrò Carmelo 2013 [13]                                                                                                                                                                                                                                                                                                                                                                                                                                                                            |
| F | 2013 | Avola, Cicerata, SR                           | 2 |  |                  |            | Zaffarana Rosario 2013 (1) [19]<br>Belfiore Vincenzo 2013 (1) [1]                                                                                                                                                                                                                                                                                                                                                                                                                                  |
| F | 2013 | Noto, Vendicari, SR                           | 1 |  | 090002<br>090027 | ZSC<br>SIC | <a href="http://www.siracusanews.it/node/39561">http://www.siracusanews.it/node/39561</a> ,<br><a href="http://www.ilsitodipalermo.it/content/522-sessantatre-uova-di-caretta-caretta-si-schiodono-nelloasi-di-vendicari">http://www.ilsitodipalermo.it/content/522-sessantatre-uova-di-caretta-caretta-si-schiodono-nelloasi-di-vendicari</a>                                                                                                                                                     |
| K | 2013 | Siculiana, Siculiana marina, AG               | 1 |  |                  |            | <a href="http://www.agrigentonotizie.it/speciale/earth-day/Siculiana-Marina-trovato-primo-nido-tartarughe-marine.html">http://www.agrigentonotizie.it/speciale/earth-day/Siculiana-Marina-trovato-primo-nido-tartarughe-marine.html</a>                                                                                                                                                                                                                                                            |
| L | 2013 | Sciacca, Capo San Marco, AG                   | 3 |  | 040012           | SIC        | <a href="http://www.wwf.it/news/notizie/?2901">http://www.wwf.it/news/notizie/?2901</a><br>(2); <a href="http://www.agrigentoflash.it/2011/09/02/sciacca-la-carica-delle-80-caretta-caretta/">http://www.agrigentoflash.it/2011/09/02/sciacca-la-carica-delle-80-caretta-caretta/</a> (1)                                                                                                                                                                                                          |
| Q | 2013 | Palermo, Mondello Lido Ombelico del mondo, PA | 1 |  |                  |            | Present study; ( <a href="http://www.siciliafan.it/tartaruga-depone-60-uova-a-mondello/">http://www.siciliafan.it/tartaruga-depone-60-uova-a-mondello/</a>                                                                                                                                                                                                                                                                                                                                         |
| E | 2014 | Augusta, Agnone, SR                           | 1 |  |                  |            | <a href="Http://www.pro-natura.it/files/redazione/natura-e-societa/2014-4.pdf">Http://www.pro-natura.it/files/redazione/natura-e-societa/2014-4.pdf</a>                                                                                                                                                                                                                                                                                                                                            |
| E | 2014 | Catania, Playa di Catania, CT                 | 1 |  |                  |            | <a href="https://tanogabo.com/alcuni-nidi-di-tartarughe-di-mare-in-sicilia/">https://tanogabo.com/alcuni-nidi-di-tartarughe-di-mare-in-sicilia/</a>                                                                                                                                                                                                                                                                                                                                                |
| F | 2014 | Noto, S. Lorenzo, SR                          | 1 |  |                  |            | <a href="Http://www.pro-natura.it/files/redazione/natura-e-societa/2014-4.pdf">Http://www.pro-natura.it/files/redazione/natura-e-societa/2014-4.pdf</a>                                                                                                                                                                                                                                                                                                                                            |
| G | 2014 | Ispica, Santa Maria del Focallo, RG           | 1 |  |                  |            | <a href="http://www.corrierediragusa.it/articoli/attualit%E0/ispica/27970-caretta-caretta-appena-nate-falcidiate-da-trattore-comunale.html">http://www.corrierediragusa.it/articoli/attualit%E0/ispica/27970-caretta-caretta-appena-nate-falcidiate-da-trattore-comunale.html</a>                                                                                                                                                                                                                  |
| L | 2014 | Menfi, Capparrina, AG                         | 1 |  |                  |            | <a href="http://www.wwf.it/news/?9140/Menfi-volontari-WWF-scoprono-nido-di-tartaruga-marina">http://www.wwf.it/news/?9140/Menfi-volontari-WWF-scoprono-nido-di-tartaruga-marina</a>                                                                                                                                                                                                                                                                                                                |
| L | 2014 | Campobello di mazara, Tre Fontane, TP         | 2 |  | 010011           | ZSC        | <a href="http://www.marsalaviva.it/cronaca/cronaca-della-provincia/item/16481-nate-59-tartarughe-nella-spiaggia-di-tre-fontane;">http://www.marsalaviva.it/cronaca/cronaca-della-provincia/item/16481-nate-59-tartarughe-nella-spiaggia-di-tre-fontane;</a><br><a href="http://www.castelvetranoselinunte.it/oltre-40-tartarughe-nate-a-tre-fontane-per-triscina-si-attende/84779/">http://www.castelvetranoselinunte.it/oltre-40-tartarughe-nate-a-tre-fontane-per-triscina-si-attende/84779/</a> |
| M | 2014 | Mazara del vallo, Tonnarella, TP              | 1 |  |                  |            | <a href="http://www.wwf.it/news/notizie/?9860">http://www.wwf.it/news/notizie/?9860</a> ,<br><a href="http://qn.quotidiano.net/lifestyle/2014/07/31/1086607-animali-tartaruga-wwf.shtml">http://qn.quotidiano.net/lifestyle/2014/07/31/1086607-animali-tartaruga-wwf.shtml</a> , <a href="http://qn.quotidiano.net/lifestyle/2014/07/04/1085375-animali-nido-caretta.shtml">http://qn.quotidiano.net/lifestyle/2014/07/04/1085375-animali-nido-caretta.shtml</a>                                   |
| E | 2015 | Catania, Playa di Catania, CT                 | 2 |  |                  |            | Present study                                                                                                                                                                                                                                                                                                                                                                                                                                                                                      |

|   |      |                                                    |   |   |                  |            |                                                                                                                                                                                                                                                                                                                                                                                                                                                                                                                                                                                                                                                                                                                |
|---|------|----------------------------------------------------|---|---|------------------|------------|----------------------------------------------------------------------------------------------------------------------------------------------------------------------------------------------------------------------------------------------------------------------------------------------------------------------------------------------------------------------------------------------------------------------------------------------------------------------------------------------------------------------------------------------------------------------------------------------------------------------------------------------------------------------------------------------------------------|
| E | 2015 | Oasi del Simeto, Villaggio Campo di Mare, CT       | 1 |   |                  |            | Present Study                                                                                                                                                                                                                                                                                                                                                                                                                                                                                                                                                                                                                                                                                                  |
| F | 2015 | Portopalo di Capopassero, Isola delle Correnti, SR | 1 |   | 090003           | ZSC        | Scala Santino 2015 [17]                                                                                                                                                                                                                                                                                                                                                                                                                                                                                                                                                                                                                                                                                        |
| J | 2015 | Agrigento, Zingarello, AG                          | 1 |   |                  |            | <a href="http://guidominciotti.blog.ilsole24ore.com/2015/08/22/sorpresa-a-zingarello-inattesa-posa-e-schiusa-di-uova-di-tartarughe-caretta-caretta/?refresh_ce=1">http://guidominciotti.blog.ilsole24ore.com/2015/08/22/sorpresa-a-zingarello-inattesa-posa-e-schiusa-di-uova-di-tartarughe-caretta-caretta/?refresh_ce=1</a>                                                                                                                                                                                                                                                                                                                                                                                  |
| K | 2015 | Siculiana,Torre salsa, AG                          | 2 |   | 040003           | ZSC        | <a href="http://www.wwf.it/petrolio_mi_sta_stretto.cfm?17320/Nuovo-nido-di-tartaruga-a-Torre-Salsa">http://www.wwf.it/petrolio_mi_sta_stretto.cfm?17320/Nuovo-nido-di-tartaruga-a-Torre-Salsa</a> ; <a href="https://www.siculiana.info/2015/07/nuovo-nido-di-caretta-caretta-nella.html">https://www.siculiana.info/2015/07/nuovo-nido-di-caretta-caretta-nella.html</a>                                                                                                                                                                                                                                                                                                                                      |
| L | 2015 | Sciacca, Capo San Marco, AG                        | 3 |   | 040012           | SIC        | <a href="http://www.vita.it/it/article/2015/07/22/nuovi-nidi-di-tartaruga-marina-a-sciacca/136031/">http://www.vita.it/it/article/2015/07/22/nuovi-nidi-di-tartaruga-marina-a-sciacca/136031/</a> ; <a href="https://www.meteoweb.eu/2015/07/le-tartarughe-caretta-caretta-preferiscono-sciacca-2-nidi-scoperti-dal-wwf/473503/">https://www.meteoweb.eu/2015/07/le-tartarughe-caretta-caretta-preferiscono-sciacca-2-nidi-scoperti-dal-wwf/473503/</a> ;<br><a href="http://www.agrigentonotizie.it/cronaca/secondo-nido-caretta-caretta-localita-san-marco-sciacca-4-agosto-2015.html">http://www.agrigentonotizie.it/cronaca/secondo-nido-caretta-caretta-localita-san-marco-sciacca-4-agosto-2015.html</a> |
| E | 2016 | Oasi del Simeto, San Francesco La Rena, CT         | 1 |   |                  |            | Present study                                                                                                                                                                                                                                                                                                                                                                                                                                                                                                                                                                                                                                                                                                  |
| E | 2016 | Oasi del Simeto, Villaggio Gabbiano BLU,CT         | 2 | 1 | 070001<br>070029 | ZSC<br>ZPS | Present study                                                                                                                                                                                                                                                                                                                                                                                                                                                                                                                                                                                                                                                                                                  |
| E | 2016 | Catania, Vaccarizzo,CT                             |   | 1 | 070001<br>070029 | ZSC<br>ZPS | Present study                                                                                                                                                                                                                                                                                                                                                                                                                                                                                                                                                                                                                                                                                                  |
| F | 2016 | Siracusa, Arenella, SR                             | 2 |   |                  |            | Cavarra Daniela 2016 (2) [4]                                                                                                                                                                                                                                                                                                                                                                                                                                                                                                                                                                                                                                                                                   |
| F | 2016 | Siracusa, Fontane Bianche, SR                      | 1 |   |                  |            | <a href="http://www.siracusanews.it/node/74516">http://www.siracusanews.it/node/74516</a>                                                                                                                                                                                                                                                                                                                                                                                                                                                                                                                                                                                                                      |
| F | 2016 | Avola, SR                                          | 3 |   |                  |            | <a href="https://www.entefaunasiciliana.it/wp-content/uploads/delightful-downloads/2020/04/Grifone-134-ANNO-XXV-n.-4-31-agosto-2016.pdf">https://www.entefaunasiciliana.it/wp-content/uploads/delightful-downloads/2020/04/Grifone-134-ANNO-XXV-n.-4-31-agosto-2016.pdf</a> (3)                                                                                                                                                                                                                                                                                                                                                                                                                                |
| F | 2016 | Noto, Lido di Noto, SR                             | 2 |   |                  |            | Falesi Laura 2016 (1) [8]<br><a href="https://www.entefaunasiciliana.it/wp-content/uploads/delightful-downloads/2020/04/Grifone-134-ANNO-XXV-n.-4-31-agosto-2016.pdf">https://www.entefaunasiciliana.it/wp-content/uploads/delightful-downloads/2020/04/Grifone-134-ANNO-XXV-n.-4-31-agosto-2016.pdf</a> (1)                                                                                                                                                                                                                                                                                                                                                                                                   |
| F | 2016 | Noto, Vendicari, SR                                | 1 | 3 | 090002<br>090027 | ZSC<br>SIC | <a href="https://www.entefaunasiciliana.it/wp-content/uploads/delightful-downloads/2020/04/Grifone-134-ANNO-XXV-n.-4-31-agosto-2016.pdf">https://www.entefaunasiciliana.it/wp-content/uploads/delightful-downloads/2020/04/Grifone-134-ANNO-XXV-n.-4-31-agosto-2016.pdf</a> (3 FC);<br><a href="https://www.entefaunasiciliana.it/wp-content/uploads/delightful-downloads/2020/04/Grifone-135-ANNO-XXV-n.-5-6-24-dicembre-2016.pdf">https://www.entefaunasiciliana.it/wp-content/uploads/delightful-downloads/2020/04/Grifone-135-ANNO-XXV-n.-5-6-24-dicembre-2016.pdf</a> (1 N)                                                                                                                               |
| F | 2016 | Noto, S. Lorenzo, SR                               | 2 |   |                  |            | Present study                                                                                                                                                                                                                                                                                                                                                                                                                                                                                                                                                                                                                                                                                                  |
| F | 2016 | Pachino, Morghella, SR                             | 1 |   |                  |            | <a href="https://www.entefaunasiciliana.it/wp-content/uploads/delightful-downloads/2020/04/Grifone-134-ANNO-XXV-n.-4-31-agosto-2016.pdf">https://www.entefaunasiciliana.it/wp-content/uploads/delightful-downloads/2020/04/Grifone-134-ANNO-XXV-n.-4-31-agosto-2016.pdf</a>                                                                                                                                                                                                                                                                                                                                                                                                                                    |

|   |      |                                                        |   |   |                  |            |                                                                                                                                                                                                                                                                                                                                                                                                                                                                                                                                                                      |
|---|------|--------------------------------------------------------|---|---|------------------|------------|----------------------------------------------------------------------------------------------------------------------------------------------------------------------------------------------------------------------------------------------------------------------------------------------------------------------------------------------------------------------------------------------------------------------------------------------------------------------------------------------------------------------------------------------------------------------|
| G | 2016 | Pachino, Costa dell'ambra, SR                          | 1 |   | 090003           | ZSC        | Betulla Alessandra 2016 [2]                                                                                                                                                                                                                                                                                                                                                                                                                                                                                                                                          |
| G | 2016 | Ispica, Santa Maria del Focallo, RG                    | 1 |   |                  |            | <a href="http://ragusa.gds.it/2016/07/31/una-caretta-caretta-sceglie-ispica-e-depone-le-sue-uova-al-focallo_546526/">http://ragusa.gds.it/2016/07/31/una-caretta-caretta-sceglie-ispica-e-depone-le-sue-uova-al-focallo_546526/</a>                                                                                                                                                                                                                                                                                                                                  |
| G | 2016 | Pozzallo, Pietrenere, RG                               | 2 |   |                  |            | <a href="http://www.lasicilia.it/news/home/23295/sulla-spiaggia-di-avola-uova-di-caretta-caretta-e-due-delfini-morti.html">http://www.lasicilia.it/news/home/23295/sulla-spiaggia-di-avola-uova-di-caretta-caretta-e-due-delfini-morti.html</a> ;<br><a href="http://meridionews.it/articolo/45133/pozzallo-caretta-caretta-deposita-le-uova-a-pietrenere-eravamo-in-spiaggia-labbiamo-vista-uscire-dallacqua/">http://meridionews.it/articolo/45133/pozzallo-caretta-caretta-deposita-le-uova-a-pietrenere-eravamo-in-spiaggia-labbiamo-vista-uscire-dallacqua/</a> |
| G | 2016 | Santa croce camerina, Punta Braccetto, RG              | 1 |   |                  |            | <a href="http://www.nuovosud.it/41276-ambiente-ragusa/punta-braccetto-tartaruga-depone-le-uova-sulla-spiaggia-di-montalbano">http://www.nuovosud.it/41276-ambiente-ragusa/punta-braccetto-tartaruga-depone-le-uova-sulla-spiaggia-di-montalbano</a>                                                                                                                                                                                                                                                                                                                  |
| J | 2016 | Porto empedocle, AG                                    | 1 |   |                  |            | <a href="http://www.agrigentonotizie.it/cronaca/porto-empedocle-salvata-piccola-caretta-caretta.html">http://www.agrigentonotizie.it/cronaca/porto-empedocle-salvata-piccola-caretta-caretta.html</a>                                                                                                                                                                                                                                                                                                                                                                |
| L | 2016 | Sciacca, Capo San Marco, AG                            |   | 1 | 040012           | SIC        | <a href="http://agrigento.gds.it/2016/10/08/nidi-di-tartarughe-a-sciacca-e-menfi-cresce-lattesa-per-la-schiusa_574328/">http://agrigento.gds.it/2016/10/08/nidi-di-tartarughe-a-sciacca-e-menfi-cresce-lattesa-per-la-schiusa_574328/</a>                                                                                                                                                                                                                                                                                                                            |
| L | 2016 | Menfi, Porto Palo, AG                                  | 1 |   |                  |            | <a href="http://www.agrigentonotizie.it/cronaca/menfi-nascono-tartartughe-caretta-caretta-porto-palo.html">http://www.agrigentonotizie.it/cronaca/menfi-nascono-tartartughe-caretta-caretta-porto-palo.html</a>                                                                                                                                                                                                                                                                                                                                                      |
| L | 2016 | Menfi, Lido Fiori, AG                                  | 1 |   | 040012           | SIC        | <a href="http://www.agrigentonotizie.it/cronaca/tartaruga-caretta-caretta-nidifica-menfi.html">http://www.agrigentonotizie.it/cronaca/tartaruga-caretta-caretta-nidifica-menfi.html</a>                                                                                                                                                                                                                                                                                                                                                                              |
| L | 2016 | Triscina, Selinunte, TP                                | 1 |   | 010011           | ZSC        | <a href="http://www.castelvetranoselinunte.it/triscina-breve-la-schiusa-delle-tartarughe-presidi-notte/85104/">http://www.castelvetranoselinunte.it/triscina-breve-la-schiusa-delle-tartarughe-presidi-notte/85104/</a>                                                                                                                                                                                                                                                                                                                                              |
| L | 2016 | Campobello di mazara, Tre Fontane, TP                  | 1 |   | 010011           | ZSC        | <a href="http://www.castelvetranoselinunte.it/triscina-breve-la-schiusa-delle-tartarughe-presidi-notte/85104/">http://www.castelvetranoselinunte.it/triscina-breve-la-schiusa-delle-tartarughe-presidi-notte/85104/</a>                                                                                                                                                                                                                                                                                                                                              |
| R | 2016 | Lascari, PA                                            | 1 |   |                  |            | <a href="https://www.wwfsicilianordoccidentale.it/2016/07/28/salvaguardia-delle-tartarughe-marine/">https://www.wwfsicilianordoccidentale.it/2016/07/28/salvaguardia-delle-tartarughe-marine/</a>                                                                                                                                                                                                                                                                                                                                                                    |
| T | 2016 | Naso, Ponte Naso, ME                                   | 1 |   |                  |            | Present study                                                                                                                                                                                                                                                                                                                                                                                                                                                                                                                                                        |
| U | 2016 | Patti, C. da Galige, ME                                |   | 1 |                  |            | Present study                                                                                                                                                                                                                                                                                                                                                                                                                                                                                                                                                        |
| E | 2017 | Oasi del Simeto, Villaggio Primosolo II; CT            | 1 | 1 | 070001<br>070029 | ZSC<br>ZPS | Present study                                                                                                                                                                                                                                                                                                                                                                                                                                                                                                                                                        |
| E | 2017 | Vaccarizzo,CT                                          | 1 |   | 070001<br>070029 | ZSC<br>ZPS | Present study                                                                                                                                                                                                                                                                                                                                                                                                                                                                                                                                                        |
| E | 2017 | Augusta,Agnone Bagni, Villaggio Porto San Leonardo, SR | 1 |   |                  |            | Present study                                                                                                                                                                                                                                                                                                                                                                                                                                                                                                                                                        |
| F | 2017 | Noto, Lido di Noto, SR                                 | 1 | 1 |                  |            | Present study                                                                                                                                                                                                                                                                                                                                                                                                                                                                                                                                                        |
| F | 2017 | Noto, Vendicari, SR                                    |   | 5 | 090002<br>090027 | ZSC<br>SIC | Present study                                                                                                                                                                                                                                                                                                                                                                                                                                                                                                                                                        |

|   |      |                                                    |   |   |                  |            |                              |
|---|------|----------------------------------------------------|---|---|------------------|------------|------------------------------|
| F | 2017 | Noto, S. Lorenzo, SR                               |   | 2 |                  |            | Present study                |
| F | 2017 | Portopalo di Capopassero, Isola delle Correnti, SR | 1 |   | 090003           | ZSC        | Present study                |
| G | 2017 | Ispica, Santa Maria del Focallo, RG                | 3 |   |                  |            | Di Rosa Antonio 2017 (3) [6] |
| G | 2017 | Pozzallo, RG                                       | 2 |   |                  |            | Present study                |
| G | 2017 | Modica, Marina di modica, RG                       | 1 |   | 080008           | ZSC        | Present study                |
| G | 2017 | Scicli, Cava d'Aliga, RG                           |   | 1 |                  |            | Present study                |
| H | 2017 | Scoglitti, Sabbie d'oro, RG                        | 1 |   |                  |            | Present study                |
| I | 2017 | Licata, Marianello, AG                             | 1 |   |                  |            | Present study                |
| K | 2017 | Siculiana,Torre salsa, AG                          | 2 | 1 | 040003           | ZSC        | Present study                |
| K | 2017 | Sciacca, Renella, AG                               |   | 1 | 040012           | SIC        | Present study                |
| L | 2017 | Sciacca, Capo San Marco, AG                        | 1 |   | 040012           | SIC        | Present study                |
| L | 2017 | Menfi, Capparrina, AG                              | 2 |   | 040012           | SIC        | Present study                |
| S | 2017 | Capo d'Orlando, ME                                 |   | 1 |                  |            | Present study                |
| D | 2018 | Calatabiano, CT                                    | 1 | 1 |                  |            | Present study                |
| E | 2018 | Catania, Oasi del Simeto, CT                       |   | 1 | 070001<br>070029 | ZSC<br>ZPS | Present study                |
| E | 2018 | Catania, Vaccarizzo,CT                             | 1 |   | 070001<br>070029 | ZSC<br>ZPS | Present study                |
| F | 2018 | Priolo, Marina di Melilli, SR                      | 1 |   |                  |            | Present study                |
| F | 2018 | Avola, SR                                          | 2 | 3 |                  |            | Present study                |
| F | 2018 | Noto, Vendicari, SR                                | 1 | 6 | 090002<br>090027 | ZSC<br>SIC | Present study                |
| F | 2018 | Noto, S. Lorenzo, SR                               | 1 |   |                  |            | Present study                |
| F | 2018 | Portopalo di Capopassero, Isola delle Correnti, SR | 2 |   | 090003           | ZSC        | Present study                |
| G | 2018 | Pachino, Costa dell'ambra, SR                      | 1 |   | 090003           | ZSC        | Present study                |
| G | 2018 | Ispica, Santa Maria del Focallo, RG                | 5 |   |                  |            | Present study                |
| G | 2018 | Scicli, Cava d'Aliga, RG                           |   | 1 |                  |            | Present study                |
| I | 2018 | Palma di montechiaro, Contrada Ciotta, AG          | 1 |   |                  |            | Present study                |
| I | 2018 | Licata, Cala del Re, AG                            | 1 |   |                  |            | Present study                |

|   |      |                                                    |   |   |                  |            |               |
|---|------|----------------------------------------------------|---|---|------------------|------------|---------------|
| K | 2018 | Siculiana, Siculiana marina, La scogliera, AG      | 1 |   |                  |            | Present study |
| K | 2018 | Torre salsa, Loc. Fungicedda, AG                   |   | 1 | 040003           | ZSC        | Present study |
| L | 2018 | Triscina, TP                                       | 1 |   | no               | Map        | Present study |
| N | 2018 | Marsala, Tp                                        | 2 |   |                  |            | Present study |
| N | 2018 | Trapani, Spiaggia della Tipa, TP                   | 1 |   | 010007           | ZSC        | Present study |
| N | 2018 | Erice, San Giuliano, TP                            | 2 |   |                  |            | Present study |
| N | 2018 | Valderice, TP                                      |   | 1 | 010025           | SIC        | Present study |
| R | 2018 | Lascari, Salinelle, PA                             |   | 1 |                  |            | Present study |
| D | 2019 | ACIREALE,SANTA TECLA, CT                           |   | 1 |                  |            | Present study |
| E | 2019 | Catania, Plaja di Catania, CT                      | 1 |   |                  |            | Present study |
| F | 2019 | Avola, Marina di Avola, SR                         |   | 1 |                  |            | Present study |
| F | 2019 | Noto, Lido di Noto, SR                             | 2 |   |                  |            | Present study |
| F | 2019 | Noto, Vendicari, SR                                |   | 3 | 090002<br>090027 | ZSC<br>SIC | Present study |
| F | 2019 | Noto, S. Lorenzo, SR                               | 1 | 1 |                  |            | Present study |
| F | 2019 | Pachino, Morghella, SR                             | 4 |   |                  |            | Present study |
| F | 2019 | Portopalo di Capopassero, Isola delle Correnti, SR | 5 | 2 | 090003           | ZSC        | Present study |
| G | 2019 | Ispica, Santa Maria del Focallo, RG                | 3 | 1 |                  |            | Present study |
| G | 2019 | Modica, Marina di modica, RG                       | 1 |   | 080008           | ZSC        | Present study |
| G | 2019 | Scicli, Sampieri, RG                               | 2 |   | 080008           | ZSC        | Present study |
| G | 2019 | Scicli, Donnalucata, RG                            | 1 | 1 |                  |            | Present study |
| H | 2019 | Scoglitti, Foce Ippari, RG                         | 1 |   |                  |            | Present study |
| J | 2019 | Agrigento, Cannatello, AG                          | 1 |   |                  |            | Present study |
| J | 2019 | Realmonte, Punta Grande, AG                        |   | 1 |                  |            | Present study |
| K | 2019 | Siculiana, Siculiana marina, AG                    | 4 | 1 |                  |            | Present study |
| K | 2019 | Siculiana,Torre salsa, AG                          | 1 |   | 040003           | ZSC        | Present study |
| L | 2019 | Sciacca, Capo San Marco, AG                        | 2 |   | 040012           | SIC        | Present study |
| L | 2019 | Menfi, Porto Palo, AG                              | 1 |   |                  |            | Present study |
| L | 2019 | Menfi, lido fiori, AG                              |   | 1 | 040012           | SIC        | Present study |



|   |      |                                                    |    |    |                  |            |                         |
|---|------|----------------------------------------------------|----|----|------------------|------------|-------------------------|
| L | 2019 | Triscina, TP                                       | 1  |    | 010011           | ZSC        | Present study           |
| R | 2019 | Cefalù, PA                                         | 1  |    |                  |            | Present study           |
| U | 2019 | Milazzo, ME                                        | 1  |    |                  |            | Isgrò Carmelo 2019 [13] |
| A | 2020 | Messina, Santo Saba, ME                            | 1  |    |                  |            | Present study           |
| B | 2020 | Giampileri, Giampileri marina, ME                  |    | 1  |                  |            | Present study           |
| D | 2020 | Calatabiano, CT                                    | 1  |    |                  |            | Present study           |
| D | 2020 | Acireale, CT                                       |    | 3  |                  |            | Present study           |
| E | 2020 | Catania, Playa di Catania, CT                      | 1  |    |                  |            | Present study           |
| E | 2020 | Catania, Oasi del Simeto, CT                       | 1  |    | 070001<br>070029 | ZSC<br>ZPS | Present study           |
| E | 2020 | Catania, Vaccarizzo, CT                            | 1  | 1  | 070001<br>070029 | ZSC<br>ZPS | Present study           |
| E | 2020 | Augusta, Agnone, SR                                | 2  | 1  |                  |            | Present study           |
| F | 2020 | Priolo, Marina di Melilli, SR                      | 1  |    |                  |            | Cilea Fabio 2020 [5]    |
| F | 2020 | Siracusa, Arenella, SR                             | 1  |    |                  |            | Present study           |
| F | 2020 | Siracusa, Ognina, SR                               | 3  |    |                  |            | Present study           |
| F | 2020 | Siracusa, Fontane Bianche, SR                      |    | 1  |                  |            | Present study           |
| F | 2020 | Avola, SR                                          | 7  | 12 |                  |            | Present study           |
| F | 2020 | Noto, Lido di Noto, SR                             | 5  | 5  |                  |            | Present study           |
| F | 2020 | Noto, Vendicari, SR                                | 1  | 1  | 090002<br>090027 | ZSC<br>SIC | Present study           |
| F | 2020 | Noto, S. Lorenzo, SR                               | 7  | 1  |                  |            | Present study           |
| F | 2020 | Pachino, La Plage Santomar, SR                     | 1  |    | 090004           | ZSC        | Present study           |
| F | 2020 | Portopalo di Capopassero, Scalo Mandrie, SR        | 2  | 1  | 090028           | SIC        | Present study           |
| F | 2020 | Portopalo di Capopassero, Isola delle Correnti, SR | 11 | 11 | 090003           | ZSC        | Present study           |
| G | 2020 | Pachino, Punta delle Formiche, SR                  |    | 1  | 090003           | ZSC        | Present study           |
| G | 2020 | Pachino, Granelli, SR                              | 1  |    |                  |            | Present study           |
| G | 2020 | Ispica, Santa Maria del Focallo, RG                |    | 1  |                  |            | Present study           |
| G | 2020 | Modica, Marina di modica, RG                       | 6  | 6  | 080008           | ZSC        | Present study           |
| G | 2020 | Scicli, Sampieri, RG                               | 1  | 1  | 080008           | ZSC        | Present study           |
| G | 2020 | Scicli, Cava d'Aliga, RG                           | 1  | 1  |                  |            | Present study           |

|   |      |                                       |   |   |                  |            |               |
|---|------|---------------------------------------|---|---|------------------|------------|---------------|
| G | 2020 | Scicli, Donnalucata, RG               | 1 | 1 |                  |            | Present study |
| G | 2020 | Scicli, Plaia Grande, RG              | 1 |   | 080001<br>080010 | ZSC<br>SIC | Present study |
| G | 2020 | Ragusa, Marina di Ragusa, RG          |   | 1 |                  |            | Present study |
| G | 2020 | Santa croce camerina, Casuzze, RG     | 2 | 2 |                  |            | Present study |
| G | 2020 | Santa croce camerina, Punta Secca, RG |   | 1 |                  |            | Present study |
| H | 2020 | Santa croce camerina, Randello, RG    | 3 | 5 | 080004           | ZSC        | Present study |
| H | 2020 | Scoglitti, Baia Dorica, RG            | 1 |   |                  |            | Present study |
| H | 2020 | Scoglitti, Kamarina, RG               |   | 1 |                  |            | Present study |
| I | 2020 | Licata, Pisciotto, AG                 | 1 |   |                  |            | Present study |
| I | 2020 | Licata, Foce Gallina, AG              |   | 4 |                  |            | Present study |
| I | 2020 | Licata, Marianello, AG                |   | 1 |                  |            | Present study |
| J | 2020 | Agrigento, Cannatello, AG             | 1 |   |                  |            | Present study |
| J | 2020 | San Leone, Le Dune, AG                | 1 |   |                  |            | Present study |
| J | 2020 | Porto empedocle, AG                   | 3 |   |                  |            | Present study |
| J | 2020 | Realmonte, Punta Grande, AG           | 1 | 1 |                  |            | Present study |
| K | 2020 | Realmonte, Giallonardo, AG            | 2 |   |                  |            | Present study |
| K | 2020 | Siculiana, Siculiana marina, AG       | 3 |   |                  |            | Present study |
| K | 2020 | Siculiana, Torre salsa, AG            | 2 |   | 040003           | ZSC        | Present study |
| K | 2020 | Ribera, Borgo bonsignore, AG          | 1 |   | 040003           | ZSC        | Present study |
| O | 2020 | San vito lo capo, TP                  |   | 3 |                  |            | Present study |
| O | 2020 | Alcamo Marina-Battigia, TP            | 1 |   |                  |            | Present study |
| O | 2020 | Alcamo Marina-Calatubo, TP            | 1 |   | 010018           | ZSC        | Present study |
| O | 2020 | Trappeto, PA                          | 1 |   |                  |            | Present study |
| S | 2020 | Capo d'Orlando, ME                    | 1 |   |                  |            | Present study |
|   |      |                                       |   |   |                  |            |               |
| T | 2020 | Naso, Ponte Naso, ME                  |   | 1 |                  |            | Present study |
| T | 2020 | Brolo, ME                             | 1 |   |                  |            | Present study |
| T | 2020 | Gliaca di Piraino, ME                 | 2 | 2 |                  |            | Present study |
| T | 2020 | Gioiosa Marea, Capo Calavà, ME        |   | 7 | 030033           | ZSC        | Present study |

|   |      |                                                    |   |    |                  |            |                                                                   |
|---|------|----------------------------------------------------|---|----|------------------|------------|-------------------------------------------------------------------|
| U | 2020 | Patti, Marina di Patti, ME                         |   | 1  |                  |            | Present study                                                     |
| U | 2020 | Milazzo, ME                                        |   | 1  |                  |            | Isgrò Carmelo 2020 [13]                                           |
| A | 2021 | Villafranca Tirrena, Saponara marittima, ME        |   | 2  |                  |            | Present study                                                     |
| C | 2021 | Roccalumera, Hotel Main, ME                        |   | 1  |                  |            | Present study                                                     |
| D | 2021 | Calatabiano, CT                                    |   | 1  |                  |            | Present study                                                     |
| E | 2021 | Catania, Plaja di Catania, CT                      | 1 |    |                  |            | Present study                                                     |
| E | 2021 | Augusta, Agnone Bagni, SR                          | 1 | 2  |                  |            | Present study                                                     |
| F | 2021 | Augusta, Paradiso, SR                              | 1 | 1  |                  |            | Present study                                                     |
| F | 2021 | Siracusa, Arenella, SR                             | 1 |    |                  |            | Present study                                                     |
| F | 2021 | Avola, SR                                          | 9 | 3  |                  |            | Present study                                                     |
| F | 2021 | Noto, Lido di Noto, SR                             | 5 | 6  |                  |            | Present study                                                     |
| F | 2021 | Noto, Vendicari, SR                                | 4 | 1  | 090002<br>090027 | ZSC<br>SIC | Present study (2 N e 1 FC) Ente Fauna Siciliana association (2 N) |
| F | 2021 | Pachino, Morghella, SR                             | 1 | 1  |                  |            | Present study                                                     |
| F | 2021 | Portopalo di Capopassero, Isola delle Correnti, SR | 6 | 8  | 090003           | ZSC        | Present study                                                     |
| G | 2021 | Pachino, Granelli, SR                              | 3 | 19 |                  |            | Present study                                                     |
| G | 2021 | Pachino, Punta delle Formiche, SR                  | 1 | 1  | 090003           | ZSC        | Present study                                                     |
| G | 2021 | Modica, Marina di modica, RG                       | 1 |    | 080008           | ZSC        | Present study                                                     |
| G | 2021 | Scicli, Sampieri, RG                               | 1 |    | 080008           | ZSC        | Present study                                                     |
| G | 2021 | Scicli, Cava d'Aliga, RG                           | 1 |    |                  |            | Present study                                                     |
| G | 2021 | Ragusa, Marina di Ragusa, RG                       | 2 |    |                  |            | Present study                                                     |
| H | 2021 | Santa croce camerina, Casuzze, RG                  | 1 |    |                  |            | Present study                                                     |
| H | 2021 | Butera, Marina di Butera, CL                       | 1 |    | 050012           | ZPS        | Present study                                                     |
| I | 2021 | Licata, Pisciotto, AG                              | 1 |    |                  |            | Present study                                                     |
| J | 2021 | Porto empedocle, AG                                | 3 |    |                  |            | Present study                                                     |
| K | 2021 | Siculiana, Siculiana marina, AG                    | 1 |    |                  |            | Present study                                                     |
| L | 2021 | Sciacca, Capo San Marco, AG                        | 1 |    | 040012           | SIC        | Present study                                                     |
| N | 2021 | Marsala, Petrosino, TP                             | 2 | 1  |                  |            | Present study                                                     |
| N | 2021 | Castelluzzo, TP                                    | 1 |    | 010029           | ZPS        | Present study                                                     |
| O | 2021 | Balestrate, PA                                     |   | 1  |                  |            | Present study                                                     |

|   |      |                                |   |   |        |     |               |
|---|------|--------------------------------|---|---|--------|-----|---------------|
| O | 2021 | Trappeto, Ciamarrita, PA       | 1 |   |        |     | Present study |
| R | 2021 | Casteldaccia, PA               |   | 1 |        |     | Present study |
| T | 2021 | Gioiosa Marea,Capo Calavà, ME  |   | 1 | 030033 | ZSC | Present study |
| U | 2021 | Milazzo, ME                    |   | 1 |        |     | Present study |
| U | 2021 | Patti, Laghetti marianello, ME |   | 2 | 030012 | ZSC | Present study |

## REFERENCES

1. Belfiore V, Legambiente val di noto association, Noto, Siracusa, Italy. Personal communications. (2013)
2. Betulla A, Beach Owner, Pachino, Siracusa, Italy. Personal Communications. (2016)
3. Casale, P, Palilla, G, Salemi, A, Napoli, A, Prinzi, M, Genco, L, et al. (2012) Exceptional sea turtle nest records in 2011 suggest an underestimated nesting potential in Sicily (Italy). Acta Herpetologica, 7(1):181-188.
4. Cavarra D, Beach owner, Siracusa, Italy. Personal comunicatons. (2016)
5. Cilea F, Lipu association Saline di Priolo, Priolo Gargallo, Siracusa, Italy. Personal communications. (2020)
6. Di Rosa A, Wwf Italy, Modica, Ragusa, Italy. Personal Communications. (2017)
7. Fabrizi D, Local citizen, Sampieri, Scicli, Ragusa, Italy. Personal communications. (1944)
8. Falesi L, Archeo club association Val di noto, Noto, Siracusa, Italy. Personal communications. (2016)
9. Galia F, WWF Italy, Licata, Agrigento, Italy. Personal communications. (1994)
10. Galia, F, Freggi, D, d'Angelo, S, Lo Valvo, M. (2006) An unusual nest activity along southern Sicilian coasts: an hope for sea turtle survival? In: 26th Annual Symposi-um on Sea Turtle Biology and Conservation, 295-296.
11. Genco, L, Culmone, G, Cortellaro, G, Federico, R, Piacentino, A, Prinzi, M. (2008) Prima segnalazione di nidificazione di tartaruga comune *Caretta caretta* in Sicilia nord-occidentale (Italia meridionale). Atti Soc. it. Sci. nat. Mus. civ. Stor. nat. Milano 149:325-330.
12. Insacco G, Inclimona V, Barlotta A, Ricotta V, Denise G, Spadola F, Blasi MF, Scaravelli D. (2011) The activity of the Sea Turtle rehabilitation in the Regional Rescue Center of Comiso (Sicily, Ragusa, Italy) in 10 years. 4th Mediterranean Conference on Marine Turtles – Napoli.
13. Isgrò C, MuMa museum, Milazzo, Messina, Italy. Personal communications. (2013) (2019) (2020)
14. Lino L, Pronatura association, Catania, Italy. Personal communications. (1960)
15. Local Citizen, Pachino, Siracusa, Italy. Personal Communications (2002)
16. Mingozi, T, Masciari, G, Paolillo, G, Pisani, B, Russo, M, Massolo, A. (2007) Discovery of a regular nesting area of loggerhead turtle *Caretta caretta* in southern Italy: a new perspective for national conservation. Biodivers. Conserv. 16: 3519-3541.
17. Scala S, Beach owner, Portopalo di Capopassero, Siracusa, Italy. Personal Communications. (2015)
18. Torrisi A, Local citizen, Catania,Italy. Personal communications. (1987) (2007)
19. Zaffarana R, Local citizen, Avola, Siracusa, Italy. Personal communications. (2013)

**Table S2.** Results of the fittest GLM for IP as dependent variable. Only variables (or levels) with  $p < 0.05$  are shown. PU F, YEAR 2020, SC OC are the first (intercept) levels (n = 74).

|             | Estimate  | Std. Error | T value | P       |
|-------------|-----------|------------|---------|---------|
| (Intercept) | 1.07E-01  | 4.48E-02   | 2.382   | 0.02038 |
| PUG         | -1.43E-03 | 6.12E-04   | -2.341  | 0.02255 |
| DATE        | -4.53E-03 | 1.60E-03   | -2.83   | 0.00632 |
| IPMT        | -3.49E-03 | 1.62E-03   | -2.149  | 0.03568 |
| DATE:IPMT   | 1.73E-04  | 5.79E-05   | 2.99    | 0.00404 |

**Table S3.** Results of the fittest GLM for HS as dependent variable. Only variables (or levels) with  $p < 0.05$  are shown. PU F, YEAR 2020, SC OC are the first (intercept) levels (n = 74).

|             | Estimate | Std. Error | z value | P        |
|-------------|----------|------------|---------|----------|
| (Intercept) | 11.42435 | 4.169888   | 2.74    | 0.006149 |
| PUG         | -0.17182 | 0.067368   | -2.55   | 0.010759 |
| PUH         | 0.696577 | 0.154689   | 4.503   | 6.70E-06 |
| PUI         | 0.803656 | 0.153202   | 5.246   | 1.56E-07 |
| PUN         | 0.374499 | 0.147379   | 2.541   | 0.011052 |
| PUO         | -0.33363 | 0.093424   | -3.571  | 0.000356 |
| YEAR2017    | 0.240395 | 0.084853   | 2.833   | 0.00461  |
| YEAR2018    | 0.550058 | 0.067571   | 8.14    | 3.94E-16 |
| YEAR2019    | 0.4774   | 0.061948   | 7.706   | 1.29E-14 |
| DATE        | -0.41289 | 0.145305   | -2.842  | 0.004489 |
| IPMT        | -0.41312 | 0.15034    | -2.748  | 0.005998 |
| SCYL        | 0.293127 | 0.050598   | 5.793   | 6.90E-09 |
| DIST        | 0.005254 | 0.0024     | 2.19    | 0.028547 |
| CS          | -0.00839 | 0.001047   | -8.016  | 1.09E-15 |
| DATE:IPMT   | 0.016023 | 0.005214   | 3.073   | 0.002117 |

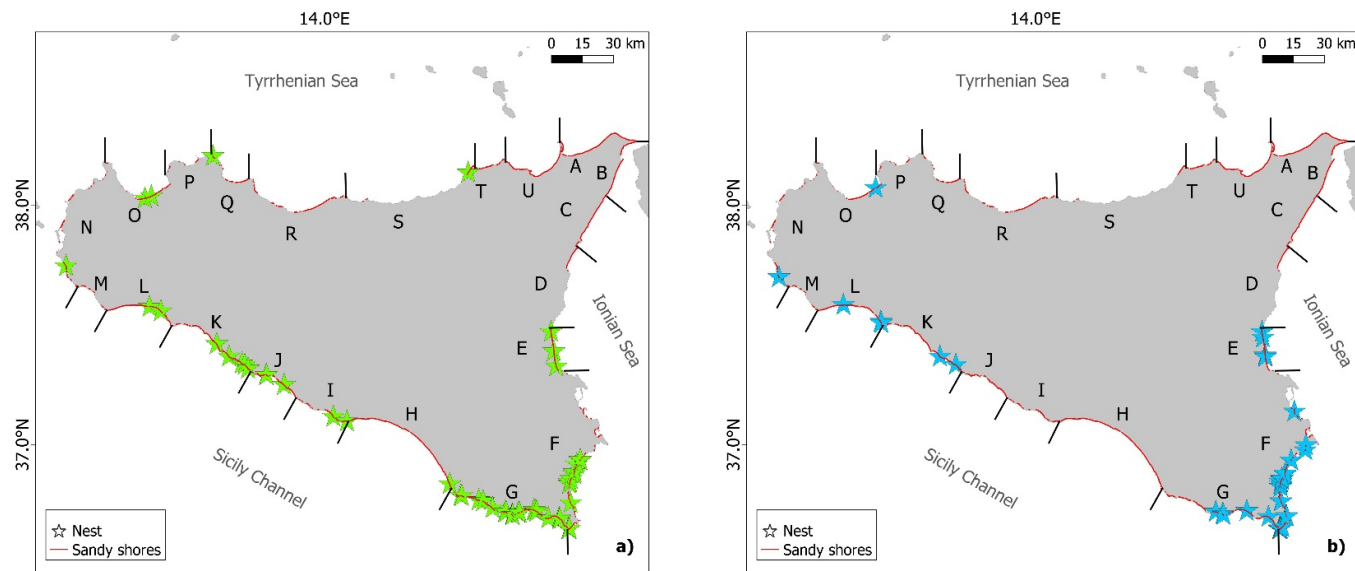

**Figure S1.** Distribution of nests with  $IP > PIP$ , potentially producing more males (a,  $n = 55$ ), and  $IP < PIP$ , potentially producing more females (b,  $n = 50$ ).

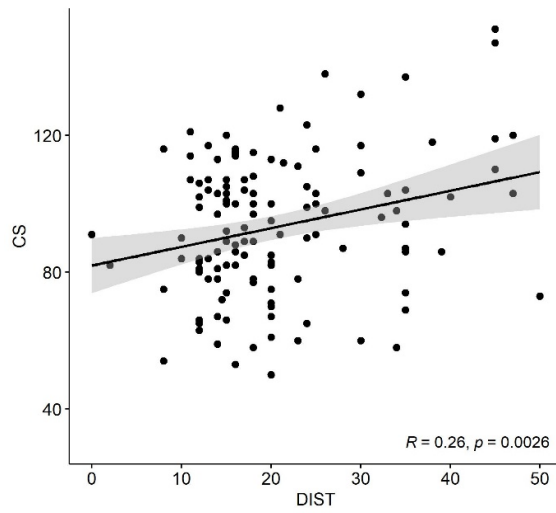

**Figure S2.** Scatterplot showing the relationship of CS and DIST, black line represents the regression line with 95% CI in light gray. Regression coefficient and P-value resulting from the Pearson chi-squared test are shown. ( $n = 127$ )

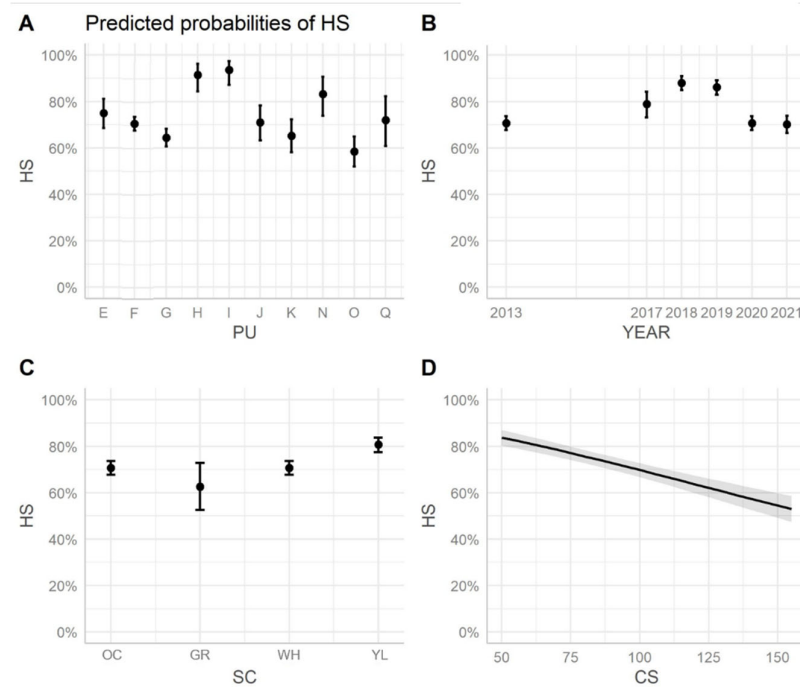

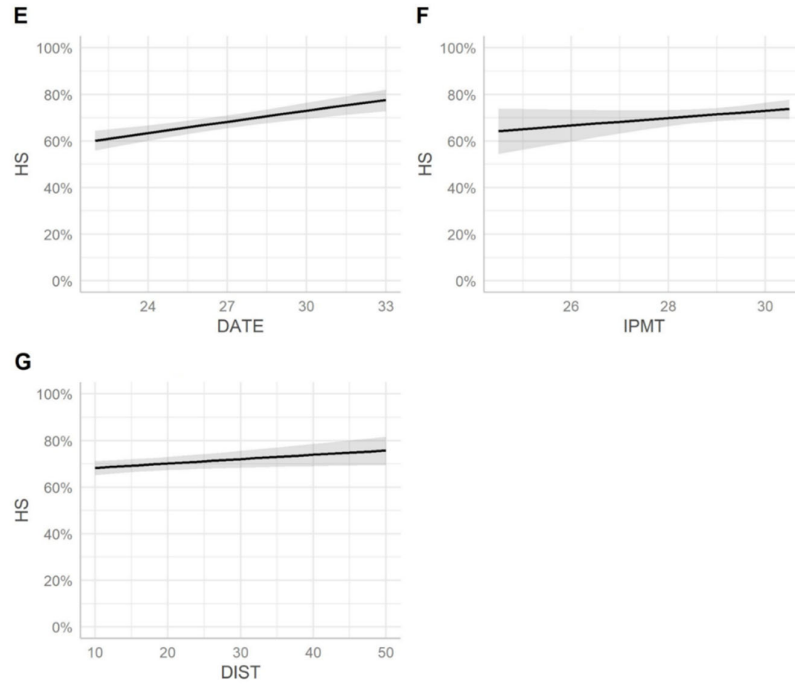

**Figure S3.** Predicted values of HS (estimated marginal means) of loggerhead turtle nests in Sicily plotted separately to show the effect of each IV, originated from the fittest GLM model. Dots in plot A-C show predicted value for each PU, YEAR, SC, whiskers represent 95% CI. Plot D-G represent regression lines based on the GLM model with 95% CI in light gray. SC: sand colour (OC: Ochre, GR: Gray, WH: White, YL: Yellow). CS: clutch size (number of eggs). DATE: date of nesting (week of the year). IPMT: mean air temperature during the incubation period (°C). DIST: distance of the nest from the shoreline (m).
